# Supplementary material for: The impact of SARS-CoV-2 infection on the outcome of acute ischemic stroke—A retrospective cohort study
Source: PubMed Central journal article supplement (PMC9980769; doi:10.1371/journal.pone.0282045), 2023-03-02
Supplement: pone.0282045.s001.pdf [file pone.0282045.s001.pdf]

| Basic Data |                 |     |                  | Stroke characteristics |                  |                                                        |                 |                   |                 |                   |                 |                 |  |
|------------|-----------------|-----|------------------|------------------------|------------------|--------------------------------------------------------|-----------------|-------------------|-----------------|-------------------|-----------------|-----------------|--|
| patient nr | COVID/non COVID | age | male=0; female=1 | stroke_yes=1; no=0     | TOAST            | Cardioembolic(1=cardioemb; 2=atheroemb; 3=smallvessel) | NIHSS admission | Imaging: location | LVO_yes=1; 0=no | LVO_1=one; 2=more | IVT_yes=1; 0=no | EVT_yes=1; 0=no |  |
| 1          | COVID           | 62  | 0                | 1                      | 5=undetermined   | 0                                                      | 8               | 1                 | 1               | 1                 | 0               | 1               |  |
| 2          | COVID           | 62  | 0                | 1                      | 5=undetermined   | 0                                                      | 4               | 1                 | 0               | 0                 | 0               | 0               |  |
| 3          | COVID           | 61  | 0                | 1                      | 2=cardioemb      | 1                                                      | 3               | 2                 | 1               | 1                 | 0               | 0               |  |
| 4          | COVID           | 95  | 1                | 1                      | 2=cardioemb      | 1                                                      | 11              | 1                 | 0               | 0                 | 0               | 0               |  |
| 5          | COVID           | 65  | 1                | 1                      | 5=undetermined   | 0                                                      | 9               | 1                 | 0               | 0                 | 0               | 0               |  |
| 6          | COVID           | 53  | 0                | 1                      | 3=smallvessel    | 0                                                      | 2               | 2                 | 0               | 0                 | 0               | 0               |  |
| 7          | COVID           | 74  | 0                | 1                      | 5=undetermined   | 0                                                      | 2               | 1                 | 0               | 0                 | 0               | 0               |  |
| 8          | COVID           | 81  | 1                | 1                      | 5=undetermined   | 0                                                      | 13              | 1                 | 0               | 0                 | 0               | 0               |  |
| 9          | COVID           | 43  | 0                | 1                      | 2=cardioemb      | 1                                                      | 3               | 3                 | 0               | 0                 | 1               | 0               |  |
| 10         | COVID           | 82  | 0                | 1                      | 2=cardioemb      | 1                                                      | 13              | 1                 | 1               | 2                 | 0               | 0               |  |
| 11         | COVID           | 67  | 0                | 1                      | 1=LargeArtAthero | 0                                                      | 1               | 2                 | 0               | 0                 | 0               | 0               |  |
| 12         | COVID           | 68  | 0                | 1                      | 5=undetermined   | 0                                                      | 4               | 1                 | 0               | 0                 | 0               | 0               |  |
| 13         | COVID           | 59  | 1                | 1                      | 5=undetermined   | 0                                                      | 1               | 1                 | 0               | 0                 | 0               | 0               |  |
| 14         | COVID           | 53  | 0                | 1                      | 2=cardioemb      | 1                                                      | 10              | 1                 | 1               | 1                 | 0               | 1               |  |
| 15         | COVID           | 73  | 0                | 1                      | 5=undetermined   | 0                                                      | 11              | 1                 | 1               | 0                 | 0               | 0               |  |
| 16         | COVID           | 76  | 1                | 1                      | 2=cardioemb      | 1                                                      | 21              | 1                 | 0               | 0                 | 0               | 0               |  |
| 17         | COVID           | 79  | 0                | 1                      | 1=LargeArtAthero | 0                                                      | 3               | 1                 | 1               | 1                 | 1               | 0               |  |
| 18         | COVID           | 94  | 1                | 1                      | 2=cardioemb      | 1                                                      | 19              | 1                 | 0               | 0                 | 0               | 0               |  |
| 19         | COVID           | 65  | 0                | 1                      | 5=undetermined   | 0                                                      | 14              | 1                 | 1               | 1                 | 0               | 0               |  |
| 20         | COVID           | 68  | 0                | 1                      | 1=LargeArtAthero | 0                                                      | 7               | 1                 | 1               | 1                 | 1               | 0               |  |
| 21         | COVID           | 88  | 1                | 1                      | 5=undetermined   | 0                                                      | 21              | 1                 | 1               | 1                 | 1               | 0               |  |
| 22         | COVID           | 54  | 0                | 1                      | 2=cardioemb      | 1                                                      | 10              | 1                 | 1               | 1                 | 0               | 1               |  |
| 23         | COVID           | 53  | 0                | 1                      | 5=undetermined   | 0                                                      | 9               | 1                 | 1               | 1                 | 0               | 1               |  |
| 24         | COVID           | 76  | 1                | 1                      | 2=cardioemb      | 1                                                      | 21              | 1                 | 1               | 1                 | 0               | 0               |  |
| 25         | COVID           | 71  | 0                | 1                      | 1=LargeArtAthero | 0                                                      | 5               | 3                 | 0               | 0                 | 0               | 0               |  |
| 26         | COVID           | 65  | 0                | 1                      | 5=undetermined   | 0                                                      | 3               | 1                 | 0               | 0                 | 0               | 0               |  |
| 27         | COVID           | 82  | 1                | 1                      | 1=LargeArtAthero | 0                                                      | 9               | 1                 | 0               | 0                 | 1               | 0               |  |
| 28         | COVID           | 64  | 1                | 1                      | 2=cardioemb      | 1                                                      | 5               | 1                 | 0               | 0                 | 0               | 0               |  |
| 29         | COVID           | 60  | 0                | 1                      | 5=undetermined   | 0                                                      | 18              | 1                 | 1               | 2                 | 1               | 0               |  |
| 30         | COVID           | 88  | 0                | 1                      | 1=LargeArtAthero | 0                                                      | 2               | 1                 | 0               | 0                 | 0               | 0               |  |
| 31         | COVID           | 78  | 0                | 1                      | 5=undetermined   | 0                                                      | 28              | 3 n.a.            |                 |                   | 0               | 0               |  |
| 32         | COVID           | 84  | 1                | 1                      | 2=cardioemb      | 1                                                      | 10              | 1                 | 0               | 0                 | 0               | 0               |  |
| 33         | non-COVID       | 60  | 0                | 1                      | 2=cardioemb      | 1                                                      | 1               | 3                 | 0               | 0                 | 0               | 0               |  |
| 34         | non-COVID       | 81  | 1                | 1                      | 5=undetermined   | 0                                                      | 7               | 1                 | 0               | 0                 | 0               | 0               |  |
| 35         | non-COVID       | 43  | 0                | 1                      | 6=ESUS           | 0                                                      | 2               | 1                 | 1               | 1                 | 0               | 0               |  |
| 36         | non-COVID       | 70  | 1                | 1                      | 3=smallvessel    | 0                                                      | 3               | 1                 | 0               | 0                 | 0               | 0               |  |
| 37         | non-COVID       | 68  | 1                | 1                      | 5=undetermined   | 0                                                      | 6               | 2                 | 0               | 0                 | 0               | 0               |  |
| 38         | non-COVID       | 75  | 0                | 1                      | 1=LargeArtAthero | 0                                                      | 1               | 1                 | 0               | 0                 | 0               | 0               |  |
| 39         | non-COVID       | 59  | 0                | 1                      | 5=undetermined   | 0                                                      | 0               | 1                 | 0               | 0                 | 0               | 0               |  |
| 40         | non-COVID       | 60  | 0                | 1                      | 6=ESUS           | 0                                                      | 30              | 2                 | 1               | 1                 | 0               | 0               |  |
| 41         | non-COVID       | 73  | 0                | 1                      | 4=otherdetermine | 0                                                      | 14              | 2                 | 1               | 1                 | 0               | 1               |  |
| 42         | non-COVID       | 61  | 0                | 1                      | 2=cardioemb      | 1                                                      | 7               | 2                 | 1               | 0                 | 0               | 0               |  |
| 43         | non-COVID       | 90  | 0                | 1                      | 5=undetermined   | 0                                                      | 0               | 1                 | 0               | 0                 | 0               | 0               |  |
| 44         | non-COVID       | 67  | 0                | 1                      | 2=cardioemb      | 1                                                      | 12              | 2                 | 0               | 0                 | 0               | 0               |  |
| 45         | non-COVID       | 85  | 1                | 1                      | 5=undetermined   | 0                                                      | 4               | 2                 | 0               | 0                 | 0               | 0               |  |
| 46         | non-COVID       | 58  | 0                | 1                      | 3=smallvessel    | 0                                                      | 2               | 1                 | 0               | 0                 | 0               | 0               |  |
| 47         | non-COVID       | 67  | 0                | 1                      | 5=undetermined   | 0                                                      | 1               | 2                 | 0               | 0                 | 1               | 0               |  |

|              |    |   |                    |   |    |   |   |   |   |   |
|--------------|----|---|--------------------|---|----|---|---|---|---|---|
| 48 non-COVID | 59 | 0 | 1 1=LargeArtAtherc | 0 | 4  | 3 | 0 | 0 | 0 | 0 |
| 49 non-COVID | 71 | 0 | 1 1=LargeArtAtherc | 0 | 2  | 2 | 0 | 0 | 0 | 0 |
| 50 non-COVID | 38 | 0 | 1 5=undetermined   | 0 | 4  | 2 | 1 | 2 | 0 | 1 |
| 51 non-COVID | 92 | 0 | 1 2=cardioemb      | 1 | 3  | 1 | 0 | 0 | 0 | 0 |
| 52 non-COVID | 89 | 1 | 1 2=cardioemb      | 1 | 4  |   | 0 | 0 | 1 | 0 |
| 53 non-COVID | 77 | 1 | 1 5=undetermined   | 0 | 3  | 2 | 0 | 0 | 0 | 0 |
| 54 non-COVID | 76 | 0 | 1 5=undetermined   | 0 | 4  | 1 | 0 | 0 | 0 | 0 |
| 55 non-COVID | 46 | 1 | 1 5=undetermined   | 0 | 2  | 2 | 0 | 0 | 0 | 0 |
| 56 non-COVID | 68 | 0 | 1 2=cardioemb      | 1 | 3  | 2 | 0 | 0 | 0 | 0 |
| 57 non-COVID | 53 | 0 | 1 5=undetermined   | 0 | 1  | 1 | 0 | 0 | 0 | 0 |
| 58 non-COVID | 48 | 0 | 1 3=smallvessel    | 0 | 3  | 1 | 0 | 0 | 0 | 0 |
| 59 non-COVID | 85 | 0 | 1 5=undetermined   | 0 | 15 | 1 | 0 | 0 | 0 | 0 |
| 60 non-COVID | 60 | 0 | 1 2=cardioemb      | 1 | 15 | 1 | 1 | 1 | 1 | 1 |
| 61 non-COVID | 75 | 1 | 1 2=cardioemb      | 1 | 8  | 1 | 0 | 1 | 0 | 0 |
| 62 non-COVID | 93 | 0 | 1 2=cardioemb      | 1 | 7  | 1 | 1 | 1 | 1 | 0 |
| 63 non-COVID | 77 | 0 | 1 5=undetermined   | 0 | 11 | 2 | 0 | 0 | 0 | 0 |
| 64 non-COVID | 81 | 0 | 1 2=cardioemb      | 1 | 10 | 1 | 1 | 0 | 0 | 1 |
| 65 non-COVID | 83 | 1 | 1 1=LargeArtAtherc | 0 | 16 | 1 | 1 | 1 | 1 | 0 |
| 66 non-COVID | 44 | 0 | 1 3=smallvessel    | 0 | 8  | 1 | 0 | 0 | 0 | 0 |
| 67 non-COVID | 90 | 1 | 1 2=cardioemb      | 1 | 11 | 1 | 0 | 0 | 0 | 0 |
| 68 non-COVID | 66 | 1 | 1 2=cardioemb      | 1 | 1  | 1 | 0 | 0 | 0 | 0 |
| 69 non-COVID | 62 | 0 | 1 1=LargeArtAtherc | 0 | 5  | 1 | 1 | 1 | 0 | 1 |
| 70 non-COVID | 80 | 0 | 1 2=cardioemb      | 1 | 8  | 1 | 0 | 0 | 0 | 0 |
| 71 non-COVID | 87 | 1 | 1 2=cardioemb      | 1 | 6  | 1 | 0 | 0 | 1 | 0 |
| 72 non-COVID | 79 | 0 | 1 3=smallvessel    | 0 | 6  | 1 | 1 | 1 | 0 | 0 |
| 73 non-COVID | 86 | 1 | 1 3=smallvessel    | 0 | 9  | 2 | 0 | 0 | 0 | 0 |
| 74 non-COVID | 56 | 0 | 1 4=otherdetermine | 0 | 2  | 3 | 0 | 0 | 0 | 0 |
| 75 non-COVID | 76 | 1 | 1 5=undetermined   | 0 | 6  | 1 | 0 | 0 | 0 | 0 |
| 76 non-COVID | 77 | 1 | 1 2=cardioemb      | 1 | 22 | 1 | 1 | 1 | 0 | 1 |
| 77 non-COVID | 50 | 0 | 1 5=undetermined   | 0 | 2  | 1 | 0 | 0 | 0 | 0 |
| 78 non-COVID | 83 | 1 | 1 5=undetermined   | 0 | 4  | 2 | 0 | 0 | 0 | 0 |
| 79 non-COVID | 85 | 0 | 1 5=undetermined   | 0 | 12 | 3 | 1 | 2 | 0 | 0 |
| 80 non-COVID | 81 | 1 | 1 2=cardioemb      | 1 | 14 | 1 | 0 | 0 | 0 | 0 |
| 81 non-COVID | 89 | 1 | 1 5=undetermined   | 0 | 20 | 1 | 1 | 1 | 0 | 0 |
| 82 non-COVID | 45 | 0 | 1 3=smallvessel    | 0 | 2  | 1 | 0 | 0 | 0 | 0 |
| 83 non-COVID | 79 | 1 | 1 1=LargeArtAtherc | 0 | 2  | 1 | 0 | 0 | 0 | 0 |

|                    | Previous Diagnoses |                |                |                |                   |                |                 |                  |                 |                 |                 |                  |  |
|--------------------|--------------------|----------------|----------------|----------------|-------------------|----------------|-----------------|------------------|-----------------|-----------------|-----------------|------------------|--|
| WHO COVID severity | HT_yes=1; 0=no     | DM_yes=1; no=0 | malignancy_yes | smoking_yes=1; | ischemic heart di | AF_1=yes; 0=no | stroke/TIA_yes= | hiperlipid_yes=1 | PAD_yes=1; no=0 | CKD_yes=1; no=0 | CPD_yes=1; no=0 | Anticoag 0=no; 1 |  |
| 3=hospital+O2 na   | 1                  | 1              | 0              | 0              | 0                 | 0              | 0               | 0                | 0               | 0               | 0               | 0                |  |
| 3=hospital+O2 na   | 1                  | 1              | 0              | 0              | 0                 | 0              | 0               | 1                | 0               | 0               | 0               | 0                |  |
| 2=hospital+no O2   | 1                  | 0              | 0              | 1              | 0                 | 1              | 0               | 1                | 1               | 0               | 0               | 0                |  |
| 3=hospital+O2 na   | 1                  | 0              | 0              | 0              | 0                 | 1              | 0               | 0                | 1               | 0               | 0               | 1                |  |
| 2=hospital+no O2   | 1                  | 1              | 0              | 0              | 1                 | 0              | 0               | 1                | 0               | 1               | 0               | 0                |  |
| 2=hospital+no O2   | 1                  | 0              | 0              | 0              | 0                 | 0              | 1               | 1                | 0               | 0               | 0               | 0                |  |
| 2=hospital+no O2   | 1                  | 1              | 0              | 0              | 0                 | 0              | 0               | 1                | 0               | 0               | 0               | 0                |  |
| 3=hospital+O2 na   | 1                  | 0              | 1              | 0              | 0                 | 0              | 1               | 0                | 0               | 0               | 1               | 0                |  |
| 2=hospital+no O2   | 0                  | 0              | 0              | 0              | 0                 | 0              | 0               | 0                | 0               | 0               | 1               | 0                |  |
| 2=hospital+no O2   | 0                  | 0              | 0              | 0              | 1                 | 1              | 0               | 0                | 0               | 0               | 0               | 0                |  |
| 2=hospital+no O2   | 0                  | 0              | 0              | 0              | 1                 | 0              | 0               | 0                | 0               | 0               | 0               | 0                |  |
| 2=hospital+no O2   | 0                  | 1              | 0              | 1              | 0                 | 0              | 0               | 0                | 0               | 0               | 0               | 0                |  |
| 2=hospital+no O2   | 0                  | 0              | 0              | 0              | 0                 | 0              | 0               | 0                | 0               | 0               | 0               | 0                |  |
| 2=hospital+no O2   | 1                  | 1              | 0              | 0              | 0                 | 0              | 0               | 0                | 0               | 0               | 0               | 0                |  |
| 2=hospital+no O2   | 1                  | 0              | 0              | 0              | 1                 | 1              | 0               | 0                | 0               | 0               | 0               | 0                |  |
| 2=hospital+no O2   | 1                  | 1              | 0              | 0              | 0                 | 1              | 0               | 0                | 0               | 0               | 0               | 0                |  |
| 2=hospital+no O2   | 1                  | 0              | 1              | 0              | 1                 | 1              | 1               | 0                | 0               | 0               | 0               | 0                |  |
| 3=hospital+O2 na   | 0                  | 0              | 0              | 0              | 0                 | 0              | 0               | 0                | 0               | 0               | 0               | 0                |  |
| 4= ICU             | 1                  | 1              | 0              | 0              | 0                 | 0              | 0               | 0                | 0               | 0               | 0               | 0                |  |
| 3=hospital+O2 na   | 1                  | 1              | 0              | 0              | 1                 | 0              | 0               | 1                | 0               | 1               | 0               | 0                |  |
| 2=hospital+no O2   | 0                  | 0              | 0              | 0              | 0                 | 0              | 0               | 0                | 0               | 0               | 0               | 0                |  |
| 4= ICU             | 0                  | 0              | 0              | 0              | 0                 | 0              | 0               | 0                | 0               | 0               | 0               | 0                |  |
| 2=hospital+no O2   | 1                  | 0              | 0              | 0              | 1                 | 1              | 0               | 0                | 0               | 0               | 0               | 0                |  |
| 3=hospital+O2 na   | 1                  | 0              | 0              | 0              | 0                 | 0              | 0               | 0                | 1               | 0               | 0               | 0                |  |
| 4= ICU             | 1                  | 0              | 1              | 0              | 0                 | 0              | 0               | 0                | 0               | 0               | 0               | 0                |  |
| 3=hospital+O2 na   | 0                  | 0              | 0              | 0              | 0                 | 0              | 1               | 0                | 1               | 0               | 0               | 0                |  |
| 3=hospital+O2 na   | 1                  | 1              | 0              | 0              | 1                 | 1              | 1               | 1                | 0               | 1               | 1               | 1                |  |
| 3=hospital+O2 na   | 1                  | 1              | 0              | 0              | 1                 | 0              | 0               | 1                | 1               | 0               | 0               | 0                |  |
| 3=hospital+O2 na   | 1                  | 0              | 0              | 0              | 0                 | 0              | 0               | 0                | 0               | 0               | 0               | 0                |  |
| 4= ICU             | 0                  | 0              | 0              | 0              | 1                 | 0              | 0               | 0                | 0               | 0               | 0               | 0                |  |
| 3=hospital+O2 na   | 1                  | 0              | 0              | 0              | 1                 | 1              | 1               | 0                | 0               | 0               | 0               | 0                |  |
| 0                  | 0                  | 0              | 0              | 0              | 0                 | 0              | 0               | 1                | 1               | 0               | 0               | 0                |  |
| 0                  | 1                  | 0              | 0              | 0              | 0                 | 0              | 0               | 0                | 1               | 0               | 0               | 0                |  |
| 1                  | 0                  | 0              | 1              | 0              | 0                 | 0              | 0               | 0                | 0               | 0               | 0               | 0                |  |
| 1                  | 1                  | 0              | 0              | 1              | 0                 | 0              | 0               | 0                | 0               | 0               | 0               | 0                |  |
| 0                  | 1                  | 0              | 0              | 1              | 0                 | 0              | 1               | 0                | 0               | 0               | 0               | 0                |  |
| 0                  | 1                  | 0              | 0              | 1              | 1                 | 0              | 0               | 1                | 1               | 1               | 0               | 0                |  |
| 0                  | 1                  | 0              | 0              | 1              | 0                 | 0              | 0               | 0                | 0               | 0               | 0               | 0                |  |
| 1                  | 1                  | 0              | 0              | 0              | 0                 | 0              | 0               | 0                | 0               | 0               | 0               | 0                |  |
| 0                  | 1                  | 0              | 0              | 1              | 0                 | 0              | 0               | 0                | 1               | 0               | 0               | 0                |  |
| 0                  | 0                  | 0              | 0              | 0              | 0                 | 0              | 0               | 1                | 0               | 0               | 0               | 0                |  |
| 0                  | 1                  | 1              | 1              | 0              | 1                 | 0              | 0               | 1                | 0               | 0               | 0               | 0                |  |
| 0                  | 1                  | 1              | 0              | 0              | 1                 | 0              | 1               | 0                | 0               | 0               | 0               | 0                |  |
| 0                  | 1                  | 0              | 0              | 1              | 0                 | 0              | 0               | 0                | 0               | 0               | 0               | 0                |  |
| 0                  | 1                  | 1              | 0              | 0              | 1                 | 0              | 0               | 0                | 0               | 0               | 0               | 0                |  |



| Lab Tests |      |     |     |      |          |           |      |       |       |     |     |     |     |
|-----------|------|-----|-----|------|----------|-----------|------|-------|-------|-----|-----|-----|-----|
| WBC       | Ly   | Thr | Hb  | Htc  | karbamid | kreatinin | eGFR | CRP   | GOT   | GPT | GGT | ALP |     |
| 7.71      | 0.61 | 383 | 137 | 0.37 | 4.8      | 60        | 90   | 70.30 |       | 24  | 45  | 86  |     |
| 10.12     | 1.29 | 418 | 135 | 0.36 | 3.6      | 51        | 90   |       | 124.2 | 94  | 96  | 73  | 88  |
| 9.84      | 2.36 | 289 | 142 | 0.41 | 6.5      | 85        | 84.3 | 6.3   |       | 23  | 28  | 36  | 67  |
| 3.1       | 1.34 | 303 | 104 | 0.32 | 5        | 74        | 59.2 | 46.2  |       | 13  | 4   | 18  | 69  |
| 12.79     | 1.44 | 320 | 127 | 0.38 | 10.5     | 132       | 36.4 | 16    |       |     | 13  | 22  | 57  |
| 4.02      | 0.63 | 207 | 144 | 0.44 | 7.3      | 108       | 67.3 | 8.6   |       |     | 36  | 81  | 81  |
| 8.19      | 1.8  | 177 | 156 | 0.44 | 6.4      | 90        | 71.8 | 1.5   |       | 14  | 10  | 16  | 66  |
| 4.54      | 9    | 324 | 137 | 0.39 | 13.7     | 88        | 53.3 | 88.7  |       | 48  | 12  | 17  | 43  |
| 11.84     | 1.18 | 194 | 153 | 0.42 | 8.5      | 76        | 90   | 2.1   |       | 24  | 43  | 22  | 72  |
| 16        | 1.33 | 329 | 125 | 0.36 | 4.8      | 65        | 86   | 118.4 |       |     | 21  | 25  |     |
| 6         | 1.45 | 171 | 144 | 0.41 | 5.7      | 58        | 90   | 1     |       | 11  | 10  | 19  |     |
| 7.61      | 2.08 | 261 | 122 | 0.38 | 3.1      | 59        | 90   | 9.2   |       | 38  | 71  | 41  | 65  |
| 7.81      | 1.74 | 319 | 152 | 0.42 | 92       | 5.6       | 81.1 | 10.3  |       | 27  | 56  | 59  | 69  |
| 8.29      | 1.66 | 362 | 135 | 0.39 | 3        | 66        | 79.9 | 1.9   |       | 27  | 17  | 13  | 96  |
| 10.76     | 1.18 | 300 | 178 | 0.54 | 10.3     | 59        | 85.6 | 6.8   |       | 79  | 60  | 581 | 356 |
| 7.16      | 1.21 | 148 | 150 | 0.43 | 5.7      | 69        | 85.7 | 6.4   |       | 23  | 22  | 54  | 60  |
| 8.39      | 3.2  | 225 | 146 | 0.43 | 9.3      | 114       | 35.6 | 10.1  |       | 42  | 51  | 94  | 202 |
| 15.2      | 1    | 125 | 133 | 0.4  | 5.3      | 108       | 61.4 | 16.2  |       | 44  | 28  | 30  |     |
| 14.9      | 1.28 | 316 | 137 | 0.39 | 7.9      | 80        | 86.4 | 199.1 |       | 37  | 41  | 34  |     |
| 4.63      | 0.38 | 123 | 151 | 0.41 | 16.1     | 121       | 34.3 | 188.9 |       | 61  | 16  | 22  |     |
| 7.8       | 1.74 | 319 | 152 | 0.42 | 5.6      | 92        | 81   | 10.3  |       | 27  | 56  | 59  |     |
| 9.78      | 0.7  | 231 | 136 | 0.37 | 8.9      | =;        | 76.6 | 201.6 |       | 146 | 104 | 494 | 139 |
| 10.76     | 1.18 | 300 | 178 | 0.54 | 10.3     | 59        | 85.6 | 6.8   |       | 79  | 60  | 581 | 356 |
| 7.86      | 1.18 | 247 | 159 | 0.44 | 5.7      | 67        | 90   | 91.2  |       | 37  | 42  | 137 |     |
| 10.46     | 0.67 | 271 | 83  | 0.24 | 56.2     | 476       | 10.2 | 21.3  |       | 22  | 23  | 83  | 96  |
| 3.7       | 0.5  | 155 | 94  | 0.3  | 2.7      | 62        | 79.8 | 24.7  |       | 51  | 12  | 20  |     |
| 9.36      | 1.05 | 246 | 104 | 0.32 | 5.4      | 73        | 74.8 | 169.9 |       | 14  | 9   | 67  |     |
| 7.03      | 1.26 | 147 | 133 | 0.36 | 12.9     | 145       | 43.3 | 1.7   |       | 48  | 98  | 104 |     |
| 13.5      | 1.15 | 177 | 115 | 0.35 | 9.7      | 86        | 69.1 | 139.4 |       | 30  | 36  | 43  | 104 |
| 14.67     | 1.66 | 54  | 100 | 0.32 | 10.1     | 178       | 30.8 | 92.9  |       | 146 | 25  | 137 | 256 |
| 23.75     | 0.66 | 269 | 133 | 0.38 | 6.4      | 76        | 61.9 | 148   |       | 22  | 17  | 379 |     |
| 6.7       | 2.68 | 282 | 144 |      |          |           | 73   | 1.4   |       |     |     |     |     |
| 14.16     | 0.97 | 253 | 163 |      |          |           | 87.5 | 1.3   |       |     |     |     |     |
| 6.15      | 1.35 | 184 | 135 |      |          |           | 90   | 46.7  |       |     |     |     |     |
| 13.9      | 0.83 | 309 | 146 |      |          |           | 55   | 105.8 |       |     |     |     |     |
| 9.98      | 1.21 | 343 | 140 |      |          |           | 90   | 5.7   |       |     |     |     |     |
| 7.3       | 2.56 | 252 | 128 |      |          |           | 61.9 | 1.1   |       |     |     |     |     |
| 9.94      | 1.99 | 448 | 136 |      |          |           | 86   | 20.8  |       |     |     |     |     |
| 16.35     | 0.44 | 33  | 183 |      |          |           | 21.6 | 9.8   |       |     |     |     |     |
| 19.68     | 2.01 | 224 | 142 |      |          |           | 71.4 | 230   |       |     |     |     |     |
| 10.96     | 0.99 | 196 | 141 |      |          |           | 90   | 6.3   |       |     |     |     |     |
| 6.85      | 2.16 | 208 | 155 |      |          |           | 60.6 | 0.6   |       |     |     |     |     |
| 11.28     | 1.33 | 276 | 177 |      |          |           | 72.5 | 9.6   |       |     |     |     |     |
| 7.01      | 1.8  | 208 | 116 |      |          |           | 37.9 | 3.6   |       |     |     |     |     |
| 8.85      | 0.89 | 214 | 169 |      |          |           | 20.2 | 6.9   |       |     |     |     |     |
| 7.46      | 1.46 | 269 | 151 |      |          |           | 90   |       |       |     |     |     |     |

|       |      |     |       |      |      |
|-------|------|-----|-------|------|------|
| 11.72 | 1.43 | 209 | 99    | 90   | 93.2 |
| 10.09 | 1.42 | 234 | 167   | 90   | 3.6  |
| 6.46  | 1.18 | 248 | 135   | 90   | 1.3  |
| 5.66  | 1.6  | 173 | 118   | 61.7 | 29.7 |
| 7.99  | 2.44 | 216 | 128   | 50.8 | 2.1  |
| 7.1   | 1.58 | 221 | 136   | 90   | 22.3 |
| 13.5  | 2.48 | 319 | 169   | 89   | 2.7  |
| 8.03  | 2.05 | 242 | 141.8 | 90   | 5    |
| 8.84  | 1.19 | 202 | 131   | 49.4 | 5.7  |
| 11.32 | 0.98 | 304 | 152   | 30   | 2.1  |
| 8.63  | 3.4  | 316 | 150   | 75.6 | 1    |
| 15.25 | 0.7  | 223 | 146   | 42.9 | 79.8 |
| 11.05 | 1.74 | 242 | 152   | 87.4 | 15.4 |
| 12.27 | 1    | 258 | 129   | 38   | 49.8 |
| 7.75  | 0.49 | 235 | 117   | 40   | 92.9 |
| 7.19  | 1.63 | 211 | 138   | 82.2 | 5.3  |
| 7.88  | 2    | 373 | 147   | 64   | 68   |
| 11.8  | 1.9  | 293 | 157   | 33   | 24   |
| 15.4  | 2.8  | 364 | 157   | 90   | 3.6  |
| 7.4   | 1.45 | 198 | 130   | 82   | 0.9  |
| 9.81  | 1.6  | 223 | 148   | 90   | 1.6  |
| 9.9   | 1.93 | 291 | 150   | 63   | 33.7 |
| 6.19  | 0.74 | 271 | 150   | 62.6 | 3.2  |
| 8.86  | 1    | 186 | 130   | 80.7 | 15.9 |
| 6.68  | 2.41 | 237 | 135   | 55.6 | 6.1  |
| 9.49  | 1.48 | 336 | 102   | 86.6 | 2.7  |
| 7.79  | 1.16 | 219 | 140   | 90   | 3.4  |
| 10.66 | 0.89 | 236 | 149   | 64.5 | 1    |
| 7.63  | 2.02 | 261 | 148   |      |      |
| 7.44  | 2.19 | 304 | 144   | 90   | 4.8  |
| 5.99  | 1.84 | 154 | 118   |      |      |
| 7.52  | 1.79 | 145 | 158   | 82.1 | 6    |
| 19.84 | 1.01 | 291 | 122   | 87.3 | 6.1  |
| 7.99  | 3.46 | 300 | 136   | 61.7 | 1.9  |
| 8.34  | 2.6  | 314 | 156   | 86.9 | 5.6  |
| 10.28 | 2.45 | 214 | 133   | 63.1 | 0.5  |

|            |         |      |               |        |                 |                  |                |                |                   |               |                   |               | Outc |  |
|------------|---------|------|---------------|--------|-----------------|------------------|----------------|----------------|-------------------|---------------|-------------------|---------------|------|--|
| INR        | d-dimer | Trop | COVID pneumon | mCT(%) | echo_yes=1; no= | Holter_yes=1; no | AF_1=yes; 0=no | novumAF_yes=1; | ICU transfer_yes; | hospital days | hospital mortalit | discharge_mRS |      |  |
| 1.09       | 72      |      | 1             | 50     | 0               | 0                | 0              | 0              | 0                 | 48            | 0                 | 3             |      |  |
| 1.12       |         |      | 1             | 100    | 1               | 1                | 1              | 0              | 0                 | 21            | 0                 | 1             |      |  |
| 1          | 1.23    |      | 0             | 0      | 1               | 1                | 1              | 1              | 0                 | 26            | 0                 | 0             |      |  |
| 1.26       | 0.34    |      | 0             | 0      | 0               | 0                | 0              | 1              | 0                 | 9             | 1                 | 6             |      |  |
| 0.88       |         |      | 1             | 5      | 0               | 0                | 0              | 0              | 0                 | 27            | 1                 | 6             |      |  |
|            | 0.34    | 7    | 0             | 0      | 0               | 0                | 0              | 0              | 0                 | 15            | 0                 | 1             |      |  |
|            |         |      | 0             | 0      | 1               | 1                | 0              | 0              | 0                 | 15            | 0                 | 2             |      |  |
| 1.16       | 2.02    |      | 1             | 70     | 0               | 0                | 0              | 0              | 0                 | 5             | 1                 | 6             |      |  |
| 1.05       | 0.5     |      | 0             | 0      | 1               | 1                | 0              | 0              | 0                 | 7             | 0                 | 1             |      |  |
|            |         |      | 1             | 75     | 0               | 0                | 1              | 0              | 0                 | 9             | 1                 | 6             |      |  |
|            |         |      | 0             | 0      | 1               | 1                | 0              | 0              | 0                 | 9             | 0                 | 1             |      |  |
| 1.06       | 0.8     |      | 1             | 5      | 0               | 0                | 0              | 0              | 0                 | 7             | 0                 | 1             |      |  |
|            |         |      | 0             | 0      | 0               | 0                | 0              | 0              | 0                 | 1             | 0                 | 1             |      |  |
| 1.01       | 1.3     | 4    | 0             | 10     | 1               | 1                | 0              | 1              | 0                 | 7             | 0                 | 0             |      |  |
| 1.05       | 1.07    | 6    | 1             | 50     | 1               | 1                | 0              | 0              | 0                 | 20            | 0                 | 3             |      |  |
| 1.26       |         |      | 0             | 0      | 0               | 0                | 1              | 0              | 0                 | 57            | 0                 | 5             |      |  |
| 1.18       | 1.28    |      | 1             | 150    | 0               | 0                | 1              | 0              | 0                 | 12            | 0                 | 5             |      |  |
| 1.05       | 3.8     | 64   | 0             | 0      | 0               | 0                | 1              | 0              | 0                 | 13            | 0                 | 5             |      |  |
| 1.29 >4,52 |         | 48   | 1             | 80     | 0               | 0                | 0              | 0              | 0                 | 17            | 1                 | 6             |      |  |
| 1.09 >4,45 |         |      | 1             | 150    | 1               | 1                | 0              | 0              | 1                 | 15            | 0                 | 0             |      |  |
| 1.23       |         | 672  | 1             | 100    | 0               | 0                | 0              | 0              | 0                 | 24            | 1                 | 6             |      |  |
| 1.01       | 1.3     | 4    | 1             | 20     | 1               | 1                | 0              | 1              | 0                 | 10            | 0                 | 0             |      |  |
| 0.91       | 2.67    | 8    | 1             | 180    | 0               | 0                | 0              | 0              | 1                 | 6             | 0                 | 6             |      |  |
| 1.26       |         |      | 0             | 0      | 0               | 0                | 1              | 0              | 0                 | 15            | 0                 | 5             |      |  |
| 1.12       |         | 16   | 0             | 0      | 0               | 0                | 0              | 0              | 0                 | 70            | 0                 | 3             |      |  |
| 1.05 >4,52 |         | 190  | 1             | 125    | 1               | 0                | 0              | 1              | 1                 | 65            | 1                 | 6             |      |  |
| 1.06 >4,31 |         | 38   | 1             | 10     | 1               | 1                | 0              | 0              | 0                 | 36            | 0                 | 5             |      |  |
| 1.09       | 0.53    |      | 1             | 10     | 0               | 0                | 1              | 0              | 0                 | 12            | 0                 | 3             |      |  |
| 0.97       | 1.62    |      | 1             | 50     | 0               | 0                | 0              | 0              | 0                 | 4             | 1                 | 6             |      |  |
| 1.01 >4,31 |         | 30   | 1             | 150    | 1               | 0                | 0              | 0              | 0                 | 20            | 0                 | 2             |      |  |
| >7         |         |      | 1             | 180    | 0               | 0                | 0              | 0              | 1                 | 1             | 1                 | 6             |      |  |
| 1.16       | 2.8     | 52   | 0             | 0      | 0               | 0                | 1              | 0              | 0                 | 19            | 1                 | 6             |      |  |
| 1.14       | 0.32    |      |               |        | 1               | 1                | 0              | 1              | 0                 | 1             | 0                 | 1             |      |  |
|            |         |      |               |        | 1               | 1                | 0              | 0              | 0                 | 14            | 0                 | 4             |      |  |
|            |         |      |               |        | 0               | 0                | 0              | 0              | 0                 | 6             | 0                 | 1             |      |  |
| 0.96       |         |      |               |        | 1               | 1                | 0              | 0              | 0                 | 12            | 0                 | 3             |      |  |
|            |         |      |               |        | 1               | 1                | 0              | 0              | 0                 | 14            | 0                 | 1             |      |  |
| 1.12       |         |      |               |        | 1               | 1                | 0              | 0              | 0                 | 5             | 0                 | 1             |      |  |
| 0.92       |         |      |               |        | 0               | 0                | 0              | 0              | 0                 | 14            | 0                 | 0             |      |  |
|            |         |      |               |        | 0               | 0                | 0              | 0              | 0                 | 3             | 1                 | 6             |      |  |
| 1.02       |         |      |               |        | 0               | 0                | 0              | 0              | 0                 | 26            | 1                 | 6             |      |  |
|            | 1.23    |      |               |        | 1               | 1                | 0              | 1              | 0                 | 17            | 0                 | 2             |      |  |
|            |         |      |               |        | 0               | 0                | 0              | 0              | 0                 | 1             | 0                 | 1             |      |  |
| 0.96       |         |      |               |        | 1               | 1                | 0              | 1              | 0                 | 15            | 0                 | 2             |      |  |
|            |         |      |               |        | 0               | 0                | 0              | 0              | 0                 | 9             | 1                 | 6             |      |  |
|            |         |      |               |        | 0               | 0                | 0              | 0              | 0                 | 7             | 0                 | 1             |      |  |
| 1          |         |      |               |        | 1               | 0                | 0              | 0              | 0                 | 7             | 0                 | 0             |      |  |

|      |      |    |   |   |   |   |   |   |    |   |   |
|------|------|----|---|---|---|---|---|---|----|---|---|
|      |      |    | 0 | 0 | 0 | 0 | 0 | 0 | 20 | 0 | 2 |
| 1.17 |      |    | 1 | 1 | 0 | 0 | 0 | 0 | 9  | 0 | 1 |
| 0.9  |      |    | 1 | 1 | 0 | 0 | 0 | 0 | 29 | 0 | 3 |
| 1.05 |      |    | 0 | 0 | 1 | 0 | 0 | 0 | 8  | 0 | 4 |
| 1.74 |      |    | 0 | 0 | 1 | 0 | 0 | 0 | 3  | 0 | 1 |
|      |      |    | 0 | 1 | 0 | 0 | 0 | 0 | 8  | 0 | 1 |
|      |      |    | 0 | 0 | 0 | 0 | 0 | 1 | 7  | 1 | 6 |
|      |      |    | 0 | 1 | 0 | 0 | 0 | 0 | 9  | 0 | 2 |
| 0.98 |      |    | 0 | 1 | 1 | 0 | 0 | 0 | 7  | 0 | 1 |
| 1.06 |      |    | 0 | 0 | 0 | 0 | 0 | 0 | 6  | 0 | 0 |
| 1.04 |      |    | 1 | 1 | 0 | 0 | 0 | 0 | 6  | 0 | 1 |
|      |      |    | 0 | 0 | 0 | 0 | 0 | 0 | 5  | 1 | 6 |
| 0.97 |      |    | 0 | 0 | 0 | 0 | 0 | 0 | 5  | 0 | 1 |
| 1.01 |      |    | 1 | 1 | 0 | 0 | 0 | 0 | 10 | 0 | 2 |
| 1.1  |      |    | 0 | 0 | 1 | 0 | 0 | 0 | 13 | 0 | 4 |
| 1    |      |    | 1 | 1 | 0 | 0 | 0 | 0 | 30 | 0 | 5 |
|      |      |    | 0 | 0 | 1 | 0 | 0 | 0 | 5  | 0 | 2 |
| 1.09 |      |    | 0 | 0 | 0 | 0 | 0 | 0 | 2  | 0 | 5 |
| 1.05 | 0.77 |    | 1 | 1 | 0 | 0 | 0 | 0 | 8  | 0 | 2 |
| 1.02 |      |    | 0 | 0 | 1 | 0 | 0 | 0 | 3  | 1 | 6 |
| 1.11 |      | 7  | 0 | 1 | 0 | 0 | 1 | 0 | 10 | 0 | 0 |
| 1.06 |      |    | 1 | 1 | 0 | 0 | 0 | 0 | 7  | 0 | 2 |
| 1.7  |      |    | 0 | 0 | 1 | 0 | 0 | 0 | 4  | 0 | 2 |
| 1.12 |      |    | 0 | 0 | 0 | 0 | 0 | 0 | 10 | 0 | 3 |
|      |      |    | 0 | 0 | 0 | 0 | 0 | 0 | 5  | 0 | 0 |
| 0.98 |      | 20 | 1 | 1 | 0 | 0 | 0 | 0 | 18 | 0 | 4 |
|      |      | 3  | 0 | 0 | 0 | 0 | 0 | 0 | 1  | 0 | 1 |
|      |      |    | 0 | 0 | 0 | 0 | 0 | 0 | 1  | 0 | 1 |
| 1.09 |      |    | 0 | 0 | 1 | 0 | 0 | 0 | 1  | 0 | 5 |
|      |      |    | 0 | 0 | 0 | 0 | 0 | 0 | 1  | 0 | 1 |
|      |      |    | 0 | 0 | 0 | 0 | 0 | 0 | 1  | 0 | 2 |
|      |      |    | 0 | 0 | 0 | 0 | 0 | 0 | 1  | 0 | 4 |
| 1.03 |      | 28 | 0 | 0 | 1 | 0 | 0 | 0 | 1  | 0 | 5 |
|      |      |    | 0 | 0 | 0 | 0 | 0 | 0 | 1  | 0 | 5 |
|      |      | 4  | 0 | 0 | 0 | 0 | 0 | 0 | 1  | 0 | 1 |
|      |      |    | 0 | 0 | 0 | 0 | 0 | 0 | 1  | 0 | 1 |



| omes           |                 |             |             |
|----------------|-----------------|-------------|-------------|
| 1 month death_ | 3 months death_ | 1 month mRS | 3 month mRS |
| 0              | 4               |             |             |
| 0              |                 |             |             |
| 0              | 0               |             |             |
| 0              | 0               | 0           | 0           |
| 0              | 1               | 5           | 6           |
| 1              |                 | 6           |             |
| 0              | 0               | 5           |             |
| 0              | 0               |             |             |
| 1              |                 | 6           |             |
| 0              | 0               | 2           |             |
| 0              |                 |             |             |
